# Supplementary material for: Montmorillonite nanosheets with enhanced photodynamic performance for synergistic bacterial ablation
Source: Royal Society of Chemistry journal article supplement (doi:10.1039/d0tb02254c), 2020-11-14
Supplement: d0tb02254c1.pdf [file d0tb02254c1.pdf]

**Supporting information for:**

**Montmorillonite Nanosheets with Enhanced Photodynamic Performance for  
Synergistic Bacterial Ablation**

Yufeng Pan<sup>#</sup>, Yuting Gao<sup>#</sup>, Jiayuan Hu, Guangyu Ye, Feng Zhou, Chunjie Yan<sup>\*</sup>

*Faculty of Materials Science and Chemistry, China University of Geosciences, 430074, Wuhan, China*

---

<sup>\*</sup> Corresponding author at: China University of Geosciences, Faculty of Materials Science and Chemistry, 430074, Wuhan, China. Tel.: +86 18971579917.  
E-mail address: chjyan@cug.edu.cn (Chunjie Yan).

### **Preparation of Na-MMT**

The properties of MMT are closely related to the types of intercalation cations. The common type of MMT in nature is Ca-MMT. Generally, the pulping performance of Na-MMT is better than that of Ca-MMT. In this experiment, Na-MMT was synthesized from Ca-MMT through its cations exchange properties. Ethanol and water as mixed solvent, the volume ratio of ethanol and deionized water is 1:9, and the solid-liquid mass ratio of the prepared Ca-MMT suspension is 1:19. Weighed 10 g of Ca-MMT, dispersed it into 190 ml of the above mixed solvent, and then added 5wt% anhydrous sodium carbonate (relative to the mass of Ca-MMT). The suspension was ball-milled for 3 h, and aged for 24 h. Then, the precipitate was obtained by centrifuging three times with water and ethanol, respectively. Finally, the precipitate was dried for 3 h in a blast drying oven at 105°C. Na-MMT powder was obtained.

### **Preparation of 2D-MMT nanosheets**

Weighed 1.5 g of Na-MMT and dispersed it in 100 ml deionized water, then conducted ultrasonic treatment for 30 min (under normal temperature), then transferred the sample to polytetrafluoroethylene beaker, put it in a refrigerator at -20°C for 5 h, then took the sample out of the refrigerator and put it into the freeze dryer to dry slowly (about 48 h), the collected solid powder was re-dispersed into deionized water, and then the above freeze-drying operations were repeated. The final collected solid powder is 2D-MMT nanosheets.

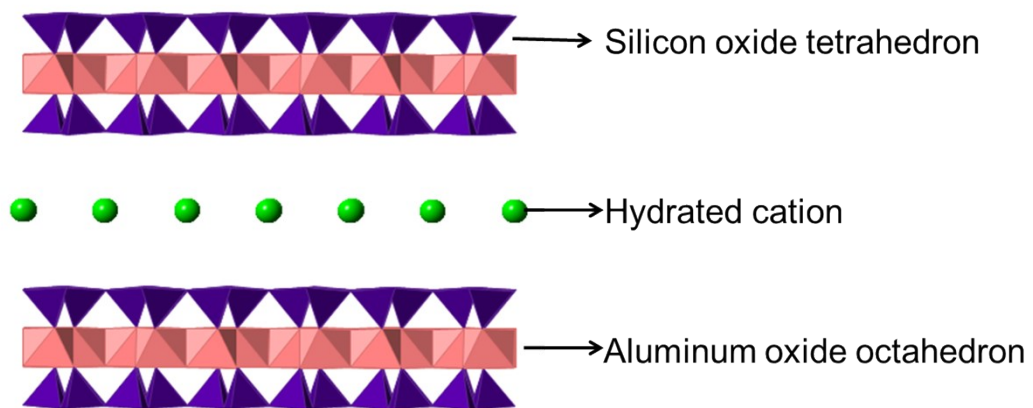

**Figure S1** Crystal structure of MMT.

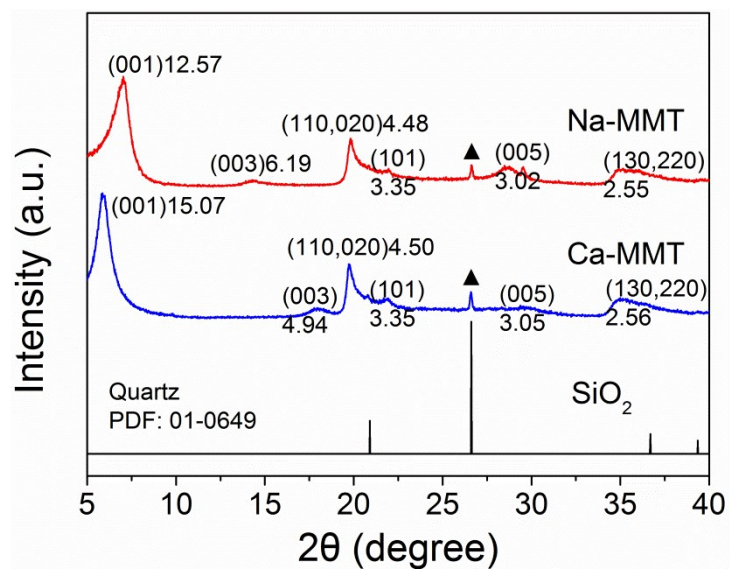

**Figure S2** XRD spectra of Na-MMT, Ca-MMT and quartz (standard PDF card 01-0649 for quartz).

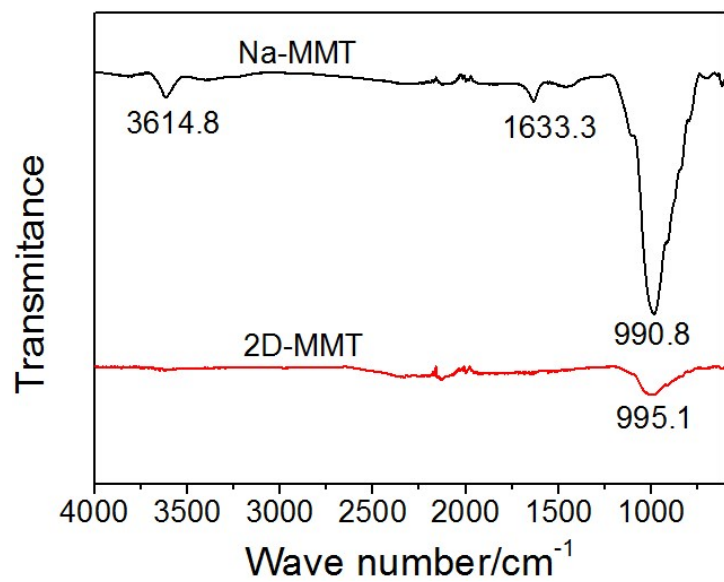

**Figure S3** FT-IR spectra of Na-MMT and 2D-MMT.

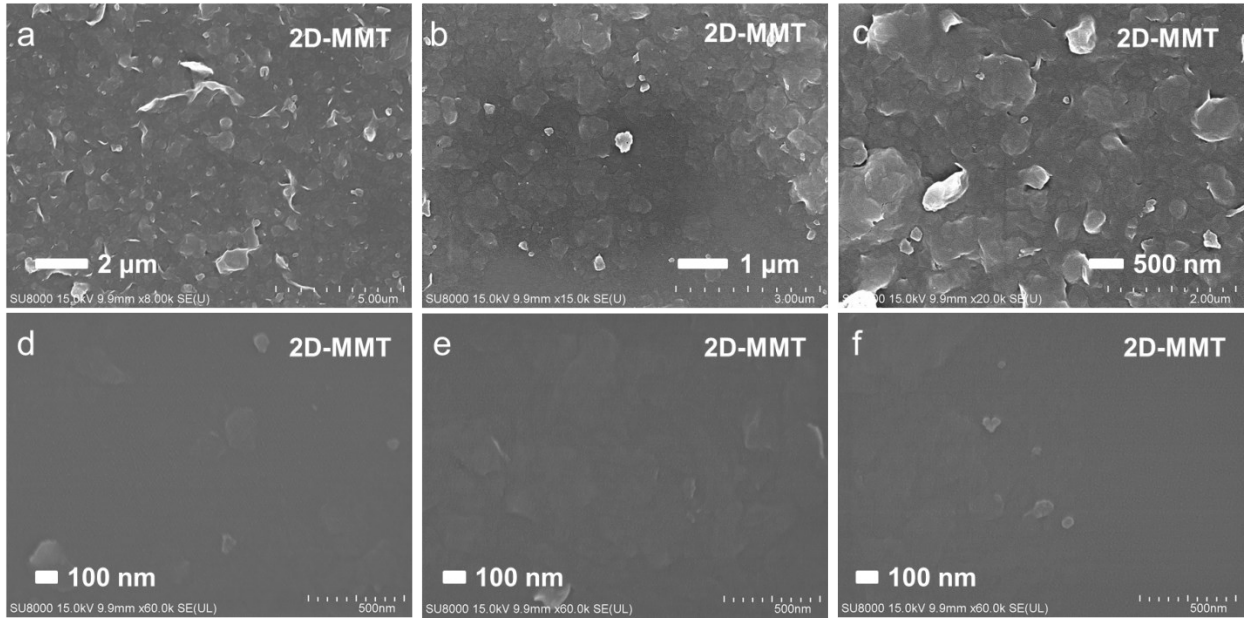

**Figure S4** SEM images of 2D-MMT nanosheets at different magnifications.

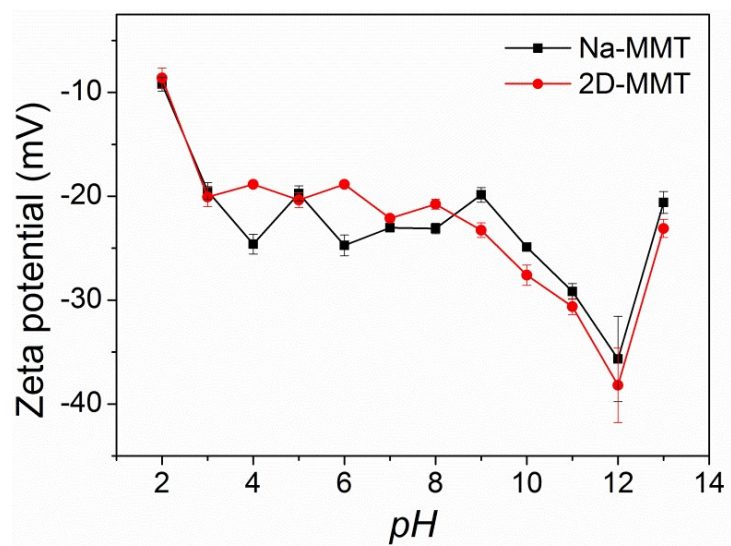

**Figure S5** Zeta potential of Na-MMT and 2D-MMT.

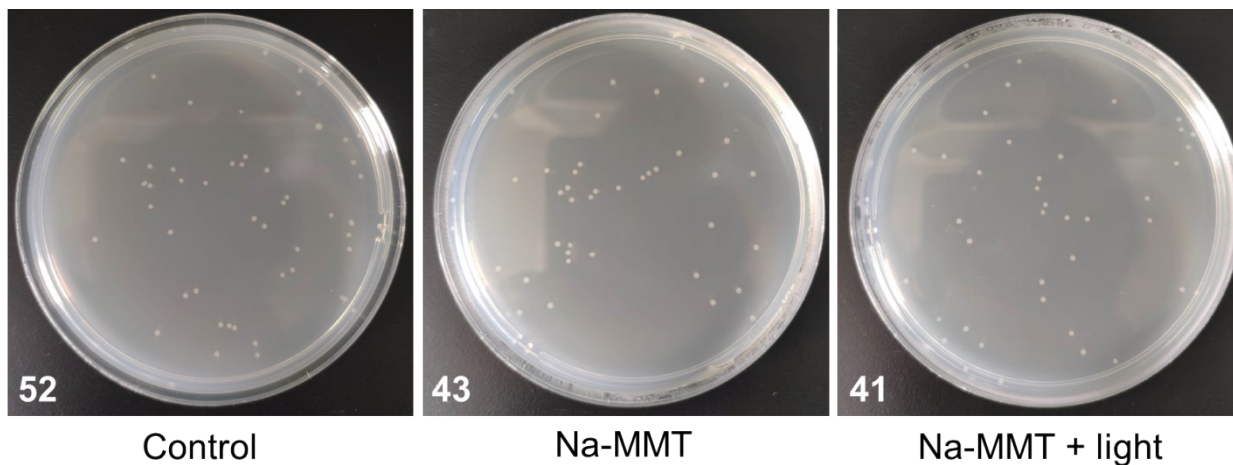

**Figure S6** Antibacterial tests with *E. coli* strains upon various treatments. Control group was treated without Na-MMT or light irradiation. Na-MMT group was treated with Na-MMT (1 mg ml<sup>-1</sup> in PBS solution). Na-MMT + light group was treated with Na-MMT (1 mg ml<sup>-1</sup> in PBS solution) and white light illumination ( $\lambda = 400\text{-}800$  nm,  $P = 4$  mW cm<sup>-2</sup>,  $t = 20$  min). After the treatment, the bacteria solution was diluted and plated on the agar plate for another 18 h at 37°C.



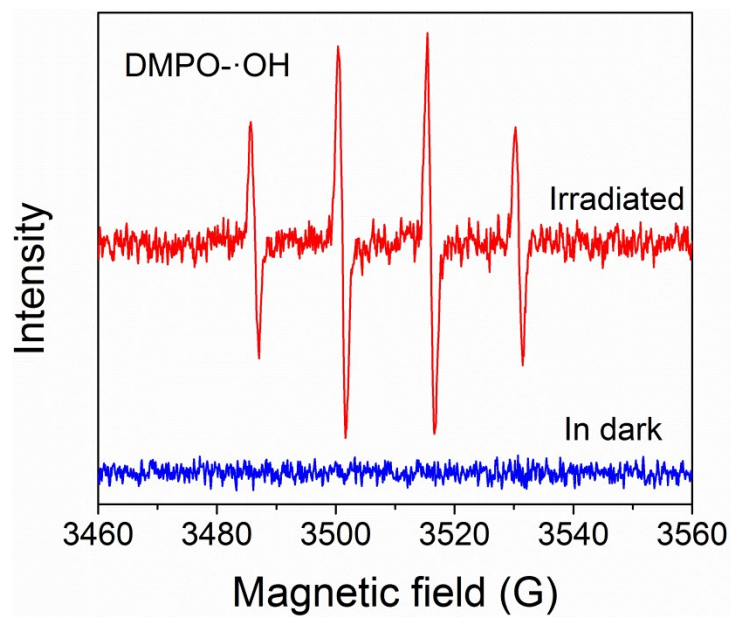

**Figure S7** EPR spectra of  $\cdot\text{OH}$  generated by 2D-MMT under light ( $\lambda = 400\text{-}800\text{ nm}$ ) for 20 min and without light condition.

**Table S1** Contents information of major elements for Ca-MMT, Na-MMT and 2D-MMT were determined by XRF.

| Sample | SiO <sub>2</sub> | Al <sub>2</sub> O <sub>3</sub> | Fe <sub>2</sub> O <sub>3</sub> | MgO  | CaO  | Na <sub>2</sub> O | K <sub>2</sub> O | MnO  | TiO <sub>2</sub> | P <sub>2</sub> O <sub>5</sub> |
|--------|------------------|--------------------------------|--------------------------------|------|------|-------------------|------------------|------|------------------|-------------------------------|
| --     | Si               | Al                             | Fe                             | Mg   | Ca   | Na                | K                | Mn   | Ti               | P                             |
|        | (%)              | (%)                            | (%)                            | (%)  | (%)  | (%)               | (%)              | (%)  | (%)              | (%)                           |
| Ca-MMT | 54.37            | 14.89                          | 3.43                           | 4.64 | 2.21 | 0.21              | 0.2              | 0.02 | 0.25             | 0.12                          |
| Na-MMT | 51.52            | 14.34                          | 3.31                           | 4.51 | 1.72 | 2.22              | 0.17             | 0.02 | 0.23             | 0.1                           |
| 2D-MMT | 55.17            | 15.34                          | 3.55                           | 4.83 | 1.87 | 2.28              | 0.17             | 0.02 | 0.25             | 0.1                           |



**Table S2** Contents information of trace elements for Ca-MMT, Na-MMT and 2D-MMT nanosheets was determined by XRF.

| Sample | Ba<br>(ppm) | Sr<br>(ppm) | Zr<br>(ppm) | Loss on<br>ignition (%) |
|--------|-------------|-------------|-------------|-------------------------|
| Ca-MMT | 112.4       | 133.1       | 828.3       | 19.57                   |
| Na-MMT | 145         | 116.5       | 793.4       | 21.78                   |
| 2D-MMT | 156.2       | 128.6       | 866.2       | 16.30                   |

**Table S3** Assignment of XRD reflections obtained for bactericides.

| Sample | $2\theta$<br>(degree) | $d_{001}$<br>(Å) | FWHM<br>(degree) |
|--------|-----------------------|------------------|------------------|
| Na-MMT | 7.03                  | 12.57            | 0.74             |
| 2D-MMT | 5.80                  | 15.24            | 0.99             |

**Table S4** Zeta potential value of Na-MMT and 2D-MMT nanosheets at pH = 2-13 (Error bars, mean  $\pm$  s.d. n = 3).

| pH | Z (Na-MMT) | Error bar         | Z (2D-MMT) | Error bar         |
|----|------------|-------------------|------------|-------------------|
| 2  | -9.2       | -9.2 $\pm$ 0.669  | -8.6       | -8.6 $\pm$ 0.964  |
| 3  | -19.5      | -19.5 $\pm$ 0.818 | -20.1      | -20.1 $\pm$ 0.945 |
| 4  | -24.6      | -24.6 $\pm$ 0.954 | -18.9      | -18.9 $\pm$ 0.208 |
| 5  | -19.7      | -19.7 $\pm$ 0.723 | -20.4      | -20.4 $\pm$ 0.702 |
| 6  | -24.7      | -24.7 $\pm$ 1.006 | -18.9      | -18.9 $\pm$ 0.252 |
| 7  | -23.0      | -23.0 $\pm$ 0.404 | -22.1      | -22.1 $\pm$ 0.321 |
| 8  | -23.1      | -23.1 $\pm$ 0.500 | -20.8      | -20.8 $\pm$ 0.473 |
| 9  | -19.8      | -19.8 $\pm$ 0.702 | -23.3      | -23.3 $\pm$ 0.709 |
| 10 | -24.9      | -24.9 $\pm$ 0.400 | -27.6      | -27.6 $\pm$ 0.985 |
| 11 | -29.2      | -29.2 $\pm$ 0.751 | -30.6      | -30.6 $\pm$ 0.764 |
| 12 | -35.7      | -35.7 $\pm$ 4.102 | -38.2      | -38.2 $\pm$ 3.604 |
| 13 | -20.6      | -20.6 $\pm$ 1.058 | -23.1      | -23.1 $\pm$ 0.872 |

**Table S5** BET details of the Na-MMT (Ref), Na-MMT and 2D-MMT nanosheets.

| Sample        | $S_{\text{BET}}$<br>( $\text{m}^2 \text{g}^{-1}$ ) | Pore volume<br>( $\text{cm}^3 \text{g}^{-1}$ ) | Pore diameter<br>(nm) |
|---------------|----------------------------------------------------|------------------------------------------------|-----------------------|
| Na-MMT (Ref.) | 29.00                                              | 0.035                                          | 5.13                  |
| Na-MMT        | 86.78                                              | 0.099                                          | 4.59                  |
| 2D-MMT        | 215.87                                             | 0.167                                          | 3.11                  |

**Table S6** PH values of liquid medium, Na-MMT and 2D-MMT suspension at room temperature (Taking the average of the three measurements).

| Sample        | pH  |
|---------------|-----|
| Liquid medium | 7.0 |
| Ca-MMT        | 7.5 |
| Na-MMT        | 8.9 |
| 2D-MMT        | 9.1 |
